# Supplementary material
Source: PubMed Central journal article supplement (PMC8606190)
Supplement: NIHMS1751027-supplement-1751027_Sup_tab_2.pdf [file NIHMS1751027-supplement-1751027_Sup_tab_2.pdf]

CA3 Spatia pval (F test Astrocytes pval (z test)

|           |               |          |
|-----------|---------------|----------|
| 2010300CC | 0.01 Pantr1   | 2.35E-09 |
| 2900026AC | 0.01 Serpine2 | 6.21E-09 |
| 3110002H1 | 0.01 Slc6a11  | 7.98E-08 |
| A830018L1 | 0.01 Gstm1    | 9.37E-08 |
| Add2      | 0.01 Emp2     | 3.74E-05 |
| Amigo2    | 0.01 Paqr7    | 5.55E-05 |
| Arhgef26  | 0.01 Ppap2b   | 6.20E-05 |
| Arhgef28  | 0.01 Mt3      | 0.000101 |
| Asic2     | 0.01 Hspb8    | 0.000114 |
| Camk4     | 0.01 Slc7a10  | 0.000144 |
| Camsap3   | 0.01 Htra1    | 0.000192 |
| Capn5     | 0.01 Rlbp1    | 0.000333 |
| Cpne7     | 0.01 Kcnj16   | 0.000368 |
| Cpne9     | 0.01 Dbx2     | 0.000779 |
| Crispld1  | 0.01 Fcgrt    | 0.00088  |
| Crym      | 0.01 Gm14964  | 0.001096 |
| Dab1      | 0.01 Luzp2    | 0.001111 |
| Dapk1     | 0.01 Gabrg1   | 0.00131  |
| Dusp5     | 0.01 Timp3    | 0.00181  |
| E2f4      | 0.01 Ntsr2    | 0.002243 |
| Eif4b     | 0.01 Gpx8     | 0.002396 |
| Ep400     | 0.01 Gm3764   | 0.002427 |
| Eps15     | 0.01 Lgi4     | 0.002567 |
| Flot2     | 0.01 Cldn10   | 0.003819 |
| Fosl2     | 0.01 Cyba     | 0.004119 |
| Foxj3     | 0.01 Maob     | 0.004192 |
| Foxp1     | 0.01 Epas1    | 0.004265 |
| Gda       | 0.01 Tril     | 0.004397 |
| Git1      | 0.01 Fxyd1    | 0.005529 |
| Gpatch11  | 0.01 Ddah1    | 0.007866 |
| Hrk       | 0.01 Hhatl    | 0.008011 |
| Iffo2     | 0.01 Id1      | 0.008078 |
| Inf2      | 0.01 Prex2    | 0.010576 |
| Kcnf1     | 0.01 Spry2    | 0.010995 |
| Kit       | 0.01 Btbd17   | 0.012068 |
| Kmt2a     | 0.01 Mertk    | 0.012901 |
| Large     | 0.01 Mdk      | 0.013074 |
| Lman2l    | 0.01 Tmem176k | 0.01492  |
| Lmo4      | 0.01 Jam2     | 0.015385 |
| Lrp1b     | 0.01 Cyp2j9   | 0.015615 |
| Lzts1     | 0.01 Itpr2    | 0.015873 |
| Map3k2    | 0.01 Lhx2     | 0.016323 |
| Mas1      | 0.01 Fjx1     | 0.016663 |
| Mctp1     | 0.01 Thrsp    | 0.018629 |

|          |               |          |
|----------|---------------|----------|
| Mndal    | 0.01 Swap70   | 0.0187   |
| Necab2   | 0.01 Gfap     | 0.020193 |
| Olfml2b  | 0.01 Gpc5     | 0.020735 |
| Plch2    | 0.01 Ppil6    | 0.0209   |
| Plcx3    | 0.01 Sod3     | 0.021649 |
| Prkrip1  | 0.01 Gm973    | 0.022747 |
| Ptpn5    | 0.01 Prom1    | 0.023264 |
| Pvrl1    | 0.01 Vim      | 0.024473 |
| Rab5a    | 0.01 Slc7a11  | 0.024702 |
| Rasl11b  | 0.01 Angpt1   | 0.025085 |
| Rgs14    | 0.01 Entpd2   | 0.025259 |
| Rhot2    | 0.01 Lix1     | 0.025889 |
| Sec14l1  | 0.01 Abhd3    | 0.025895 |
| Sel1l3   | 0.01 Prodh    | 0.027739 |
| Slc24a3  | 0.01 Emx2     | 0.02839  |
| Slc25a25 | 0.01 Slco1c1  | 0.029024 |
| Slc30a3  | 0.01 Rdh5     | 0.029082 |
| Slit2    | 0.01 Fzd2     | 0.029324 |
| Sms      | 0.01 Ednrb    | 0.030532 |
| Spink8   | 0.01 Tnfrsf1a | 0.030784 |
| Ssx2ip   | 0.01 Selenbp1 | 0.030953 |
| Tbc1d9b  | 0.01 Acss1    | 0.031021 |
| Tmem191c | 0.01 Mfsd2a   | 0.035232 |
| Trim23   | 0.01 Clic1    | 0.035292 |
| Trps1    | 0.01 Hes5     | 0.035508 |
| Tsfm     | 0.01 Slc7a2   | 0.036419 |
| Usp45    | 0.01 F3       | 0.037121 |
| Wipf3    | 0.01 Hopx     | 0.038062 |
| Zdbf2    | 0.01 Ranbp3l  | 0.039459 |
| Zfp804a  | 0.01 Slc27a1  | 0.040359 |
|          | Crot          | 0.041019 |
|          | Abca1         | 0.042907 |
|          | 15000150:     | 0.043881 |
|          | Itgb5         | 0.044865 |
|          | Mmp14         | 0.04496  |
|          | Notch1        | 0.045291 |
|          | Nrarp         | 0.046204 |
|          | Cpq           | 0.04716  |
|          | Itih5         | 0.047806 |
